1 **Subsidy Accessibility Drives Asymmetric Food Web Responses**

2

3 Marie Gutgesell<sup>1</sup>, Bailey C. McMeans<sup>2</sup>, Matthew M. Guzzo<sup>1</sup>, Valesca deGroot<sup>3</sup>, Aaron T. Fisk<sup>5</sup>,

4 Timothy B. Johnson<sup>4</sup>, Kevin S. McCann<sup>1</sup>

5

6 <sup>1</sup> Integrative Biology, University of Guelph, Guelph ON, Canada

7 <sup>2</sup> Department of Biology, University of Toronto Mississauga, Mississauga ON, Canada

8 <sup>3</sup> Ocean Science Centre, Memorial University of Newfoundland, Logy Bay, NL, Canada

9 <sup>4</sup> Ontario Ministry of Natural Resources and Forestry, Glenora Fisheries Station, Picton, ON, Canada

10 <sup>5</sup> School of the Environment, University of Windsor, Windsor, ON, Canada

11

12 **Abstract (max 350 words)**

13 Global change is fundamentally altering flows of natural and anthropogenic subsidies across space  
14 and time. After a pointed call for research on subsidies in the 1990s, an industry of empirical work  
15 has documented the ubiquitous role subsidies play in ecosystem structure, stability and function.  
16 Here, we argue that physical constraints (e.g., water temperature) and species traits can govern a  
17 species' accessibility to resource subsidies, and that these physical constraints have been largely  
18 overlooked in the subsidy literature. We examined the input of a high quality, point-source  
19 anthropogenic subsidy into a recipient freshwater lake food web (i.e., released net-pen aquaculture  
20 feed in Parry Sound, Lake Huron), to demonstrate the importance of subsidy accessibility in  
21 governing recipient whole food web responses. By using a combined bio-tracer approach, we  
22 detect a gradient in accessibility of the anthropogenic subsidy within the surrounding food web  
23 driven by the thermal tolerances of three constituent species. This thermally-driven accessibility  
24 gradient drives asymmetrical changes in food web structure, effectively rewiring the recipient lake  
25 food web and altering patterns in secondary production with yet unknown stability consequences.  
26 Since aquaculture is predicted to increase significantly in coming decades to support growing  
27 human populations, and global change is altering temperature regimes, then this form of food web  
28 alteration may be expected to occur frequently. We argue that subsidy accessibility is a key  
29 characteristic of recipient food web interactions that must be considered when trying to understand  
30 the impacts of subsidies on ecosystem stability and function under continued global change.

31

32 **Keywords:** Subsidy accessibility, anthropogenic subsidies, food web structure, bio-tracers, stable  
33 isotopes, fatty acids, net-pen aquaculture, lake

34

35

## 36 **Introduction**

37 Ecosystems are intrinsically connected through space and time by flows of energy (i.e.,  
38 subsidies) that ultimately help govern the receiving ecosystem's stability and function.

39 Foundational work by empirical ecologists in the late 1990's demonstrated the ubiquity of  
40 natural subsidies (e.g., nutrients, detritus, prey) connecting landscapes across a broad range of  
41 spatial and temporal scales (Polis & Strong, 1996; Polis & Winemillar 1996; Polis et al., 1997;  
42 Sears et al., 2004). This empirical work led to theory demonstrating that subsidies are pivotal in  
43 determining the stability and community composition of recipient food webs (Polis et al., 1997;  
44 Huxel & McCann, 1998; Sears et al., 2004, Takimoto et al. 2002). While subsidies occur  
45 naturally, a growing human population is increasing the prevalence of anthropogenic subsidies  
46 to natural ecosystems (e.g., agricultural nutrient run-off, sewage, net-pen aquaculture waste).  
47 Akin to natural subsidies, anthropogenic subsidies also have the potential to influence recipient  
48 food web dynamics (DeBruyn et al., 2004; Rodewald et al., 2011; Newsom et al., 2015; Singer  
49 et al., 2016; Lee et al., 2018; Johnson et al., 2018; DeBruyn et al., 2020). As food web dynamics  
50 govern whole ecosystem stability and function (de Ruiter et al., 1995; Neutel et al., 2002), it is  
51 imperative to understand how recipient food webs respond to both natural and anthropogenic  
52 subsidies under continued global change.

53         It is now well recognized that fluxes of subsidies play a major role across most  
54 ecosystems (Leroux & Loreau, 2008) and also ought to significantly impact the stability and  
55 functioning of recipient ecosystems (Huxel & McCann, 1998; Takimoto et al., 2002; Leroux &  
56 Loreau, 2008). An industry of empirical and theoretical research has emerged since Polis and  
57 others introduced subsidies to food web theory in the 1990s with researchers exploring the

58 various ways subsidies can impact recipient ecosystems. Research has concentrated on: i)  
59 subsidy quality and quantity; ii) the temporal nature of subsidies (e.g., Nakano et al., 1999;  
60 Nakano & Murakami, 2001; Sears et al., 2004); iii) the role of subsidies in driving trophic  
61 cascades (Huxel & McCann, 1998), and; iv) the roles space and ecosystem type play in  
62 governing subsidy flow rate, assimilation, and magnitude of resultant impacts on food web  
63 dynamics (Leroux & Loreau, 2008). While this research has made major progress, surprisingly  
64 little work has looked at the role of species traits (e.g., thermal preference) and physical habitat  
65 characteristics (e.g., water temperature) in determining subsidy accessibility, and how this may  
66 govern whole food web responses. Since accessibility may allow us to better understand how  
67 subsidies integrate into whole recipient webs this is a major gap in subsidy research.

68         While subsidies are generally thought to be ubiquitous in nature, it is less understood  
69 how the physical location of a subsidy within a habitat or ecosystem impacts its ability to be  
70 accessed and thus assimilated by members of the local food web. Subsidy accessibility, defined  
71 as the degree of availability of subsidies to recipient species based on their physiological (e.g.,  
72 thermal tolerance) and physical habitat limitations, can drive differential increases in  
73 productivity throughout the receiving food web. According to optimal foraging theory, if  
74 capable, species will alter their foraging behaviour to access the highest density/quality resource  
75 available (i.e., also referred to as the Birdfeeder Effect at the community level (Eveleigh et al.,  
76 2007)). However, species may be limited in their ability to respond to these changes in local  
77 resource densities by traits, such as mobility and thermal tolerance. For example, subsidies  
78 entering the nearshore zone of a temperate lake may be expected to be most easily accessed by  
79 warm adapted fishes and least accessible to cold adapted species. Therefore, in the example  
80 above, we may expect to see the greatest alteration in diet towards subsidies in warm water

81 species and reduced or absent alteration in diet in cold water species. This type of asymmetrical  
82 subsidy accessibility and uptake can in turn drive differential changes in productivity and thus  
83 food web structure throughout whole recipient ecosystem. Here, we combine the ideas that  
84 species optimally forage within their physical and physiological capabilities and the asymmetric  
85 impacts of spatial subsidies on receiving food webs, to suggest that species' ability to access  
86 subsidies can drive differential (or asymmetric) changes in food web productivity and structure.

87         In this study, we broadly examine the dispersal of a point-source anthropogenic subsidy into a  
88 temperate lake food web that contains dominant mobile, generalist top predators from each of the three  
89 thermal guilds (i.e., a gradient in trait responses from cold- to cool to warm- water fish) (Magnuson et  
90 al., 1990). We build off empirical evidence of assimilation of a high-quality anthropogenic subsidy in  
91 our study system, released net-pen aquaculture feed (Johnson et al., 2018), to demonstrate how  
92 accessibility to this subsidy is key in governing the receiving food web's response to this novel  
93 anthropogenic energy source. Differential accessibility throughout the recipient food web has the  
94 potential to differentially alter productivity and thus asymmetrically alter food web structure (e.g.,  
95 differential changes in food chain length). As changes in food web structure can drive alterations in  
96 food web dynamics, this is a key first step in understanding how subsidy accessibility may ultimately  
97 influence food web stability. Here, we use a combined bio-tracer approach to trace the fate of the  
98 anthropogenic subsidy throughout the lake food web, and then combine hydroacoustic, fish biomass,  
99 and stable isotope data to detect asymmetrical shifts in food web productivity and structure (i.e., food  
100 chain length) across a thermal gradient.

## 101 **Methods**

### 102 *Site Description*

103 Parry Sound, located in Georgian Bay of Lake Huron, was chosen as our study site to  
104 investigate how accessibility to a point-source anthropogenic subsidy influenced assimilation  
105 into a surrounding food web and alterations in subsequent food web productivity and structure.  
106 This location presents an ideal study system to address this question as there is a large  
107 consistent, long-term, high quality point-source anthropogenic subsidy (i.e., released net-pen  
108 feed & waste from Aqua-Cage Fisheries Ltd.). Rainbow trout are reared within the Aqua-Cage  
109 net-pens and are fed daily from feed boats that move between cages from ~9:00-16:00 each day  
110 (Kana Upton, Aqua-Cage Fisheries Ltd., Pers. Comm). Feed consists of pelleted food  
111 manufactured from both aquatic and terrestrial energy sources (see Appendix1: Table S1 and  
112 Table S2 for composition of the fish feeds). Parry Sound undergoes thermal stratification during  
113 summer, which creates a natural thermal gradient from the near-shore, warm littoral zones (that  
114 are more accessible to fishes with warmer thermal preferences) to the off-shore, cold pelagic  
115 zones (that are more accessible to fishes with colder thermal preferences). The location of the  
116 point-source subsidy in the deep, cold region of the lake thus sets up a natural gradient of  
117 accessibility to the net-pen feed from most accessible (cold-water species), intermediate  
118 accessibility (cool-water species), to least accessible (warm-water species).

119 To determine if any changes in diet and food web structure in Parry Sound were in fact  
120 driven by differential assimilation of net-pen feed, we selected multiple control sites around  
121 Georgian Bay, Lake Huron (see Appendix 1: Figure S1 for map). Control sites were selected by  
122 the following criteria: no presence of off-shore point-source anthropogenic subsidy, far distance  
123 to ensure no mixing of populations between subsidy and control sites, and presence of  
124 comparable species. One control site was sampled in 2016 (Shawaniga/Sturgeon Bay) and three  
125 control sites were sampled in in 2017 (Shawniga/Sturgeon Bay, Key Harbour, and Dyers Bay).

126 *Fish & Baseline Sampling*

127 Muscle tissue samples were collected from fish and whole invertebrates for stable  
128 isotope (SI) and fatty acid (FA) analysis from both Parry Sound and control sites in 2016 and  
129 2017. Fish and invertebrate species were selected to recreate a tri-trophic generalist lake food  
130 web that contains a dominant generalist top predator in all three thermal guilds (lake trout (cold),  
131 walleye (cool), smallmouth bass (warm)), cold off-shore (alewife & rainbow smelt) and cool  
132 near-shore (yellow perch) forage fish, and off-shore/near-shore baseline invertebrates. Figure 1  
133 shows conceptual diagram of the tri-trophic generalist lake food web sampled.

134 Fish samples were collected using Ontario multi-mesh gill nets following a modified  
135 broad-scale monitoring (BsM) protocol of the fish community (Sandstrom et al., 2013) and  
136 supplemented with targeted angling. Both overnight and daytime sets were employed in the  
137 sampling protocol. All gill nets were set for a duration of ~12 h before retrieving fish. Weight  
138 (g), length (mm), and two muscle tissue plugs from behind the dorsal fin were collected from  
139 fish. Non-predatory insect larvae (i.e., *Ephemeroptera* larvae), snails and mussels (*Unionidae*  
140 *sp.*, and *Dreissena polymorpha*) were collected from each sampling site to provide baseline  
141 stable isotope values. Additionally, feed and muscle tissue from farmed rainbow trout was also  
142 collected each year Aqua-Cage Fisheries in Parry Sound. All samples were stored at -20°C after  
143 collection until further analysis.

144 One muscle tissue plug from all fish, feed, and baseline samples collected were prepared  
145 for stable isotope analysis. Samples were thawed in the lab and dried at 60 °C in a drying oven  
146 for 48 h. Once dried, they were individually ground using a mortar and pestle and scooped into a  
147 labelled centrifuge tube. The samples were sent to the University of Windsor GLIER (Windsor,  
148 ON, Canada) laboratories for carbon and nitrogen isotopic analysis. Muscle tissues from a subset

149 of the fish collected were sent for fatty acid analysis, along with feed and baseline samples.  
150 Frozen samples were delivered to Ryerson University – The Arts Lab (Toronto, ON, Canada) in  
151 2016, and both the Laboratory of Aquatic Sciences (Chicoutimi, QC, Canada) and Lipid  
152 Analytical Services (Guelph, ON, Canada) in 2017. All labs conducted fatty acid analysis using  
153 a combination of Bligh & Dyer and Morrison & Smith methods (Bligh & Dyer, 1959; Morrison  
154 & Smith, 1964). Individual FA weights (ug/g) were converted to a % FA composition and fatty  
155 acids with >1% presence were retained for analysis.

### 156 *Detecting Assimilation of Net-Pen Subsidy into Surrounding Food Web*

157 To determine which fatty acids were key indicators of net-pen aquaculture feed (i.e.,  
158 fatty acids that are known to be primarily dietary-derived and are significantly higher or lower in  
159 the feed than in natural surrounding prey sources) a principal components analysis (PCA) was  
160 conducted on fatty acids with >1% average proportions present in forage fish, feed, and baseline  
161 fatty acid profiles from all sites. Fatty acid % were standardized to a mean of zero and unit  
162 variance prior to their inclusion in the PCA, and separate PCAs were performed for 2016 and  
163 2017 because different fish feeds with different compositions were used in each year (see  
164 Supplementary Table 1, Table 2, & Figure 2). Fatty acids with significant loadings ( $> \pm 0.3$ )  
165 along PC1 (indicating significantly higher amounts in feed than natural food sources) were  
166 retained as Feed Indicator Fatty Acids (FIFA).

167 FIFA composition of each individual species was then compared between net-pen and  
168 control sites using PCAs. The goal of this analysis was to determine if there was distinct  
169 clustering of net-pen and control populations driven by the FIFA. To test whether the distance  
170 between the net pen and control sites increased from warm to cool to cold water species  
171 (reflecting increasing access to and assimilation of the net-pen subsidies), we compared the



172 Euclidean distance between the centroids of the clusters within the PCA. PERMANOVA was  
173 used to test for significant differences in the % FIFA composition between net-pen and control  
174 sites for each species (Anderson, 2017). As this technique yields pseudo-F statistics, P-values  
175 can be calculated using permutations that yield P-values with significance considered for  
176  $P < 0.05$ . Due to the small and differing sample sizes, we conducted 100,000 permutations to  
177 compute a nonparametric PERMANOVA (Steeves et al., 2018). Univariate boxplot comparisons  
178 were used to identify which FIFA were driving significant differences in FIFA profiles.

### 179 *Detecting Local Changes in Recipient Food Web Biomass Densities*

180 Hydroacoustic surveys were conducted in 2017 to determine the horizontal and vertical  
181 spatial distribution of fish surrounding the net-pen facility to detect local aggregations of fish  
182 densities surrounding the point-source subsidy input, indicating potential local increases in  
183 productivity. One day and one night survey was conducted on July 5 (day survey from 14:30-  
184 19:00) and July 6 (night survey from 23:45 - 04:00) 2017 following a 2000 m transects leading  
185 away from the net-pen facility (see map inset in Fig. 6). All surveys were conducted following  
186 the standard operating procedures outlined in Parker-Stetter et al. (2009) (see Appendix 2 for  
187 method details).

188 To determine if there were significantly higher densities of fish closer to the point-source  
189 subsidy input location, Echoview acoustic post-processing software version 7.1.36.30718 was  
190 used to convert the cleaned fish count data into fish density values (see Supplementary Methods  
191 for details). Fish density values were extracted from Echoview and linear regressions ( $\alpha = 0.05$ )  
192 were conducted to compare fish density to distance from net-pen for both night and day surveys.  
193 Non-linear data was log transformed prior to statistical analysis.

### 194 *Detecting Regional Changes in Receiving Food Web Biomass*

195 Fish biomass data from five sites across Georgian Bay (Fig. 7) were obtained from the  
196 MNRF's 2017 Broad-scale Monitoring program (see UGLMU, 2018 for detailed collection  
197 methods), to determine if the off-shore net-pen subsidy in Parry Sound drove asymmetrical  
198 increases in the cold water, off-shore (pelagic) biomass. Biomass proportions of all species  
199 caught in the 2017 BsM sampling was extracted from the MNRF Annual Report of Fisheries  
200 Assessment Projects Conducted on Lake Huron, 2017 and sorted into a thermal guild based on  
201 their thermal preference (Hasnian et al., 2018). Species with final temperature preferendum  
202 (FTP, the temperature that fish gravitate towards when provided with a broad range of  
203 temperatures (Hasnain et al., 2018))  $<17^{\circ}\text{C}$  were classified as cold,  $17\text{-}25^{\circ}\text{C}$  were classified as  
204 cool, and  $>25^{\circ}\text{C}$  were classified as warm (Coker et al., 2001). Total proportion of each thermal  
205 guild and proportion of each individual species was calculated. Distribution of total biomass  
206 across thermal guilds and species was then compared to see if Parry Sound had  
207 disproportionately higher biomass in the cold, off-shore thermal guild relative to sites with no  
208 net-pen facilities.

### 209 *Detecting Changes in Receiving Food Web Structure*

210 To detect alterations in food web structure driven by the point-source subsidy in Parry Sound, we  
211 compared the trophic position of the representative food web collected from Parry Sound and control  
212 sites in 2016 and 2017 using a carbon and nitrogen two-source stable isotope mixing model (Post,  
213 2002). There is little to no fractionation of  $\delta^{13}\text{C}$  and is used to track basal energy sources (i.e., %  
214 littoral carbon use), while  $\delta^{15}\text{N}$  fractionates from resource to consumer and thus is used to track  
215 trophic position. To increase the number of control sites, additional  $\delta^{15}\text{N}$  and  $\delta^{13}\text{C}$  data was obtained  
216 for comparable species from numerous control sites around Lake Huron in 2017 as part of various  
217 OMNRF research projects (UGLMU, 2018) (see Appendix 1: Figure S1 for map of sites). All

218 information regarding collection of these samples can be found in the OMNRF Annual Report of  
219 Fisheries Assessment Projects Conducted on Lake Huron, 2017 (UGLMU, 2018). Non-lipid corrected  
220 C and N values were used as the majority of C:N were low ( $81\% < 3.5$  and  $92\% < 4$ ) (Post et al.,  
221 2007).

222 The following equations were used to calculate trophic position for the mobile, generalist  
223 top predators, which incorporate coupling of pelagic and littoral energy channels ((Post, 2002):

$$224 \quad TP_{Predator} = 2 + (\delta^{15}N_{predator} - (\delta^{15}N_{pelagic\ baseline} * (1 - \alpha) + \delta^{15}N_{littoral\ baseline} * \alpha)) / 3.4$$

$$225 \quad \alpha = (\delta^{13}C_{predator} - \delta^{13}C_{pelagic\ baseline}) / (\delta^{13}C_{littoral\ baseline} - \delta^{13}C_{pelagic\ baseline})$$

226 where  $\delta^{15}N_{predator}$  and  $\delta^{13}C_{predator}$ , are the nitrogen and carbon stable isotope values for predatory  
227 fish collected (lake trout, walleye, smallmouth bass) and  $\delta^{15}N_{pelagic\ baseline}$ ,  $\delta^{13}C_{pelagic\ baseline}$ ,  $\delta^{15}N_{littoral\ baseline}$ ,  $\delta^{13}C_{littoral\ baseline}$  are the nitrogen and carbon stable isotope values for  
228 mussels/zooplankton and mayflies respectively. Coupling is incorporated into trophic position  
229 calculation through  $\alpha$ , which weighs the trophic position estimate according to baseline  
230 contributions (Vander Zanden et al., 1999; Vander Zanden et al., 2000).

232 Trophic position of forage fish was calculated using the following equation, which does  
233 not incorporate coupling (Post, 2002):

$$234 \quad TP_{Intermediate\ Consumer} = 2 + (\delta^{15}N_{prey\ fish} - (\delta^{15}N_{baseline})) / 3.4$$

235 where  $\delta^{15}N_{prey\ fish}$  and  $\delta^{15}N_{baseline}$  are the nitrogen stable isotope values of forage fish and  
236 associated baseline (e.g., littoral forage fish would use littoral baselines). To test for significant  
237 differences in trophic position between subsidy and control sites, ANOVA with TukeyHSD  
238 post-hoc analysis was conducted ( $\alpha = 0.05$ ).

239 All statistical analysis was completed using the R statistical computing package, version  
240 3.6.1 (R Core Team 2019). Full raw data and associated R code will be available on GitHub  
241 upon manuscript acceptance.

242

## 243 **Results**

### 244 *Net-pen Aquaculture Feed Indicator Fatty Acid Selection*

245 PCA of all fatty acids (FA) composing >1% of total FA composition for each forage fish,  
246 baseline, and feed sample from net-pen and control sites in 2016 and 2017 successfully  
247 separated net-pen feed sources from natural biota across PC1 (Fig 2. (a), (b)). PC1 explained  
248 38.3% of total variation of fatty acid composition in 2016 and 38.8% in 2017. This variance was  
249 primarily driven by 3 FA in 2016 (higher % in feed: 18:2n6, 18:1n9, 20:1n9), and 4 FA in 2017  
250 (higher % in feed: 18:2n6, 18:3n3, 18:1n9, 16:1n7), which all loaded significantly onto PC1 and  
251 in the direction of the net-pen feed (i.e., PC score > 0.3). These FA were retained as ‘feed  
252 indicator fatty acids’ (FIFA) to be used in subsequent analysis comparing individual species  
253 FIFA compositions between net-pen and control sites.

### 254 *Asymmetrical Uptake of Net-Pen Subsidies Across Thermal Guilds*

255 PCA on FIFA profiles of individual species between net-pen and control sites in 2016 and  
256 2017 show differences in the degree of separation of net-pen and control populations among thermal  
257 guild and trophic level. The cold-water top predator (Fig. 4(a; *i*)) and forage fish (Fig. 4(b; *i*)), as well  
258 as the cool-water forage fish (Fig. 3(d; *i*); Fig. 4(c; *i*)) demonstrate the highest degree of separation  
259 between net-pen and control populations. The cool-water top predator demonstrates some degree of  
260 separation between net-pen and control populations (Fig. 3(a; *i*); Fig. 4(c; *i*)), and the warm-water top  
261 predator shows some separation of populations in 2016, but a complete overlap with control

262 populations in 2017 (Fig. 3(b; *i*); Fig. 4(d; *i*)). Euclidean distances between cluster centroids of net-pen  
263 and control populations demonstrate a negative relationship between species thermal preference (i.e.,  
264 FTP) and centroid distance, where cold water species tend to have the greatest distance between  
265 populations and warm water species the least (Figure 5).

266 PERMANOVA comparing the % FFA composition between net-pen and control populations  
267 of each species shows that cold-water top predators ( $p = 0.0036$ ), cold-water forage fish ( $p = 0.0304$ )  
268 and cool water forage fish ( $p = 0.0343$ ) have the most significantly different FFA profiles relative to  
269 control sites in 2017. The 2016 cool-water forage fish population had the most significant difference in  
270 FFA populations across both years ( $p = 0.0008$ ). In the cold-water top predator and forage fish these  
271 significant differences are driven by higher levels of linoleic acid (18:2n6) and linolenic acid (18:3n3)  
272 in net-pen populations relative to control (Fig. 4, (a; *ii*); (b; *ii*)). In the cool-water forage fish,  
273 significant differences are driven by higher levels of all FFA in net-pen populations for both 2016 and  
274 2017. The cool-water top predator (i.e., Walleye) net-pen associated FFA composition was  
275 significantly different from control populations in 2017 ( $p = 0.0384$ ) but not in 2016 ( $p = 0.378$ ).  
276 Consistent with cold-water species, Walleye also demonstrated higher levels of linoleic acid (18:2n6)  
277 and linolenic acid (18:3n3) in net-pen populations relative to control in 2017 (Fig. 4, (c; *ii*)). Despite  
278 not demonstrating significant differences in overall FFA profiles in 2016, univariate boxplots show  
279 Walleye still exhibited higher levels of FFA relative to the control population (Fig. 3, (a; *ii*)). The  
280 warm-water top predator (i.e., Smallmouth bass) showed no difference in FFA profiles in 2017 ( $p =$   
281  $0.633$ ) and a marginally significant difference in all 3 FFA in 2016 ( $p = 0.056$ ). Univariate boxplots  
282 results show that this marginal significance was driven by higher levels of all 3 FFA in 2016 net-pen  
283 associated smallmouth bass.

284 *Asymmetric Changes in Recipient Food Web Productivity*

285           Linear regression of fish density surrounding net-pen facility demonstrate increased local  
286 aggregations of fish density closer to the net-pen facility than farther away (Figure 6). The strength of  
287 aggregation around the net-pen was stronger at night than during the day. While both day and night  
288 surveys show decreases in fish density with increasing distance from the net-pen, only the night  
289 transect was significant (Night:  $p = 0.0089$ ; Day:  $p = 0.4595$ ). The net-pen is located in 75 m of water  
290 and the transect led away from shore, thus we can eliminate the possibility that this effect is caused by  
291 a near-shore, littoral increase in fish densities.

292           Comparison of biomass distribution of cold, cool and warm water species in net-pen (Parry  
293 Sound and South Bay) vs. 4 control sites across Georgian Bay, demonstrate Parry Sound and South  
294 Bay have higher proportions of cold-water biomass than control sites (Figure 7), which was not  
295 reflected in the cool- and warm-water guilds. A large proportion of the cold water biomass in Parry  
296 Sound is comprised of Lake Trout (12.46%), Cisco (2.94%) and Alewife (1.21%), which are three  
297 cold-water species that were much less abundant throughout the Georgian Bay (see Supplementary  
298 Table 3 for % biomass of species at sites across Georgian Bay).

#### 299 *Asymmetric Changes in Recipient Food Web Structure*

300           The ANOVAs comparing trophic position of cold, cool, and warm water species collected  
301 across Lake Huron found that the cold-water top predator and cold water forage fish have significantly  
302 higher trophic positions in Parry Sound relative to any other control site in Lake Huron ( $F = 40.328$ ,  $p$   
303  $= <0.001$ ;  $F = 48.582$ ,  $p = <0.001$ , respectively) (Figure 6 (a), (d)). Cool-water top predators and  
304 forage fish exhibited significant differences in trophic position between sites across Lake Huron ( $F =$   
305  $15.352$ ,  $p = <0.001$ ;  $F = 18.878$ ,  $p = <0.001$ , respectively), however this significance was not driven by  
306 higher trophic position in Parry Sound relative to all control sites (Figure 6 (b),(e)). Warm-water top  
307 predators did not exhibit significant differences between net-pen and control sites ( $F=2.948$ ,  $p =$

308 0.06219) (Fig. 6(c).) It should be noted that the MNRF data only included pelagic baselines, therefore  
309 coupling was not possible to calculate and incorporate into trophic position calculation of MNRF  
310 sampled generalist predators. Statistical outcomes were consistent regardless of if coupling was  
311 incorporated or not, thus coupling was incorporated where possible to provide more accurate trophic  
312 position estimates when able.

### 313 **Discussion**

314 Despite the fact that accessibility may fundamentally alter the influence of a subsidy on  
315 resultant food web dynamics, surprisingly this aspect of subsidies remains relatively unexplored. Here,  
316 we use a natural experiment to determine how species traits, particularly thermal tolerance, influenced  
317 accessibility to an off-shore point-source anthropogenic subsidy, and in turn show that differential  
318 accessibility drives asymmetric changes in food web productivity and structure. Our results suggest  
319 that species traits can produce a gradient in subsidy accessibility, as cold-water adapted species show  
320 the greatest evidence of subsidy consumption, and warm-water species demonstrate little to none.  
321 Notably, our feeding results also scale up to show consistent asymmetric changes in productivity and  
322 food web structure such that cold-water species, for example, consume most of the subsidy and have  
323 elevated biomass and trophic position.

324 Recent work has argued that climate change can be expected to generally have asymmetrical  
325 impacts on habitat (e.g., habitats differentially warmed by climate change) that lead to organismal  
326 behaviour that asymmetrically rewires whole carbon pathways. Bartley et al (2018) argued that  
327 differential habitat changes and species behaviour (traits) then drive wholesale food web rewiring. Our  
328 results here suggest that such impacts of climate change rewiring may extend more broadly to other  
329 aspects of global change. Specifically, here we showed that the placement of net-pen aquaculture in  
330 cold-water habitats (i.e., a global change that is necessarily habitat dependent and so asymmetrical)

331 produces stronger interactions as a function of species traits (i.e., thermal tolerance) and so  
332 functionally rewires this ecosystem, altering food web structure and productivity with yet unknown  
333 stability implications (Blanchard et al., 2015; Bartley et al. 2018). Like climate change, net-pen inputs  
334 can differentially alter macrohabitats (littoral versus pelagic) and so drive asymmetric rewiring. It  
335 remains to be seen whether human impacts that cross multiple habitats generally have asymmetrical  
336 impacts, and if they do, this suggests a general rewiring result of global change on spatial food webs.

337         The use of fatty acids to trace specific prey items through food webs has provided a powerful  
338 tool for understanding how subsidies move through and are utilized by the surrounding ecosystem.  
339 Fatty acid composition analysis has been widely used in the aquaculture literature to identify the  
340 presence of net-pen feed in the diet of surrounding fish species in both marine and freshwater systems  
341 (Kullman et al., 2009; Fernandez-Jover et al., 2011; Johnson et al., 2018). The presence of marine and  
342 terrestrial derived protein and oil in fish feed differentiate the fatty acid composition of the feed from  
343 natural food sources (Fernandez-Jover et al., 2011). Fatty acids are highly conserved throughout the  
344 food web, which provides the ability to trace net-pen feed through a surrounding food web because  
345 differences in fatty acid composition between net-pen and control populations is proportional to the  
346 amount of feed consumed (Fernandez-Jover et al., 2011).

347         We demonstrated how subsidy accessibility, measured through amount of consumption of net-  
348 pen feed, depends on species' traits (e.g., thermal tolerance). Cold-water mobile generalists and forage  
349 fish had significant differences in feed indicator fatty acid (FIFA) composition relative to control  
350 populations (little overlap in FIFA clusters, large centroid distance (Fig. 4; Fig. 5)). This suggests their  
351 diet is significantly different from control diets due to the presence of feed. Cold-water forage fish  
352 were less significantly different than the mobile generalist, which may be a factor of the different  
353 dominant pelagic forage fish found in each locations (Alewife in Parry Sound, Rainbow Smelt in



354 Dyer's Bay). In our study, cool-water forage fish had the most significant difference in FIFA profile in  
355 2016, and while still significant in 2017, not as significant as the cold-water generalist and forage fish.  
356 Cool-water mobile generalists' FIFA profiles were also significantly different from control  
357 populations, however the signal was not as strong (centroid distance not as far, more cluster overlap)  
358 as in the cold-water species. The cool-water generalist and forage fish also displayed higher variation  
359 in the Parry Sound populations relative to controls and cold-water species. This suggests there may be  
360 more individual variation in the cool-water guild, where some individuals strongly incorporate FIFA  
361 and some were no different than other control fish. Warm-water mobile generalists demonstrated high  
362 overlap between net pen and control sites, suggesting little to no feed uptake and low access to net-pen  
363 subsidies in 2017. Marginally significant differences between net pen and control sites in 2016  
364 indicate some individuals may have accessed net-pen subsidies that year. Some evidence of access in  
365 2016 may be due to warmer temperatures that summer (Parry Sound Historical Weather Data,  
366 Environment Canada), which may have made a larger warmer zone and thus able to forage farther and  
367 potentially access net-pen resources. It should be noted that littoral baselines (i.e., mayflies) had  
368 similar values of linolenic acid (18:3n3) and higher values of palmitoleic acid (16:1n7) relative to the  
369 feed due to the input of terrestrial oils in the feed (Appendix 1: Figure S1). This may drive similarities  
370 in FIFA profiles of littoral cool and warm water species; therefore, it is important to focus on fatty  
371 acids that are significantly different from the feed as stronger feed indicators in these species. Here,  
372 our results provide evidence of a gradient in net-pen feed uptake, that is correlated with the gradient in  
373 thermal preferences, suggesting thermal tolerances limit the ability of surrounding species to access  
374 point-source subsidies. Further, our results suggest the intriguing possibility that the population of  
375 cold-water species (e.g. lake trout) generally respond to consume from the cold-water feed site, while

376 more thermally generalized species (cool-water) show greater variation in response suggesting  
377 individual variation in amount of feed intake.

378 By looking at changes in local and regional fish density and biomass patterns, we were able to  
379 simultaneously detect asymmetrical increases in biomass of the surrounding food web along the  
380 accessibility gradient. These changes in biomass suggest asymmetrical access to net-pen resources  
381 may drive differential productivity in the surrounding food web (e.g., cold-water species elevated).  
382 Investigation into patterns of fish density surrounding the net-pen showed increased density locally  
383 around the net-pen, suggesting surrounding species aggregate to forage on the released net-pen  
384 subsidy. These aggregations were also stronger at night, when fish are actively foraging. Our results  
385 follow previous aquaculture literature that demonstrates increased fish densities surrounding fish farm  
386 operations in both marine and freshwater systems (Fernandez-Jover et al., 2007; Johnston et al.,  
387 2010; Rennie et al., 2019) Investigation of the distribution of regional fish biomass demonstrated that  
388 Parry Sound had a higher proportion of biomass of cold-water species relative to sites with no point-  
389 source subsidy present. The high biomass of cold-water species was largely driven by higher  
390 proportion of biomass of lake trout relative to all other sites studied in Georgian Bay, Lake Huron.  
391 Parry Sound also supports a natural reproducing lake trout population that does not undergo yearly  
392 stocking (UGLMU, 2018). South Bay was the only site that had comparable proportion of total  
393 biomass in the cold-water guild. However, here the guild is dominated by whitefish and there are no  
394 lake trout present, it also supports a lower diversity of cold-water fish than Parry Sound (Appendix 1:  
395 Table S3). The significantly higher proportion of offshore biomass in Parry Sound, and presence of a  
396 naturally reproducing off-shore top predator that strongly accesses net-pen feed, suggests net-pen  
397 subsidies may be increasing off-shore productivity. Further research investigating how these released  
398 subsidies are influencing basal food web productivity (i.e., zooplankton biomass) will be helpful in

399 elucidating the mechanism through which net-pen subsidies are driving significantly higher cold-water  
400 guild biomass in Parry Sound.

401       Through examination of trophic position of net-pen associated species and control species  
402 throughout Lake Huron, we detected significant increases in trophic position of cold-water species in  
403 Parry Sound relative to all other sites in Lake Huron, which was not reflected in cool and warm water  
404 species. As higher trophic positions indicate longer food chains (Vander Zanden et al., 1999), these  
405 results suggest that thermal guilds with the greatest accessibility to net-pen subsidies (in this case cold-  
406 water guild) have a significantly longer food chain than guilds with less access. Therefore, the gradient  
407 in subsidy accessibility drives asymmetric changes in surrounding food web structure (i.e., lengthening  
408 of cold water food chain, no lengthening of cool-warm water food chain). These results are supported  
409 by previous work conducted by Johnson et al. (2018) that provided the first evidence of higher trophic  
410 position in cold-water species in net-pen associated sites. Asymmetrical changes in food web structure  
411 can fundamentally rewire whole food webs (Bartley et al., 2019), which influences whole food web  
412 stability and function in yet unknown ways. As accessibility is a main driver of these asymmetric  
413 changes in surrounding food web that may influence whole food web stability, our research highlights  
414 the importance of looking at subsidy accessibility when trying to understand or predict subsidy-driven  
415 food web dynamics.

416       Here, we provide the first evidence that accessibility gradients to subsidies do exist and can  
417 largely influence the strength of subsidy assimilation and changes in resultant food web productivity  
418 and structure. To determine if subsidy accessibility is ubiquitous across ecosystems (i.e., is this a  
419 characteristic of subsidies that is always relevant), more empirical studies investigating this concept  
420 are needed. Additionally, theoretical work focused on understanding how asymmetrical changes in

421 productivity and structure based on differential accessibility scenarios influence food web stability and  
422 function are needed to understand the dynamical implications of subsidy accessibility.

423         Global change and increasing human populations are continually altering the flow of natural  
424 and anthropogenic subsidies throughout ecosystems, thus it is imperative to understand how these  
425 subsidies, in combination with global changes, will influence future food web stability and function.  
426 Elucidating key subsidy characteristics that drive changes in recipient food web structure and function  
427 is essential. Here, we contribute another key subsidy characteristic, subsidy accessibility, that has yet  
428 to be considered in subsidy literature. While this study shows how accessibility is key in determining  
429 food web responses to an anthropogenic subsidy, we argue this concept can be more widely applied to  
430 all subsidies and is a key characteristic of subsidy-receiving food web interactions that must be  
431 considered when trying to understand subsidy impacts on receiving ecosystem stability and function  
432 under continued global change.

### 433 **Acknowledgments**

434 This project was in part funded by the University of Guelph's Canada First Research Excellence Fund  
435 project "Food from Thought," awarded to K.S.M, and from Aqua-Cage Fisheries Ltd. We would like  
436 to thank the Ontario Ministry of Natural Resources and Forestry (OMNRF) and their multiple  
437 sampling programs that contributed to this study.

438

439

440

441

442

443

444 **Literature Cited**

- 445 Anderson, M. J. 2017. Permutational Multivariate Analysis of Variance (PERMANOVA). Wiley  
446 StatsRef: Statistics Reference Online:1–15.
- 447 Bartley, T., K. S. Mccann, and C. Bieg. 2018. Food web rewiring in a changing world.  
448
- 449 Blanchard, J. L. A. A rewired food web. *Nature* 527, 7–8 (2015).
- 450 Coker, G. A., C. B. Portt, and C. K. Minns. 2001. Morphological and Ecological Characteristics of  
451 Canadian Freshwater Fishes. Canadian Manuscript Report of Fisheries and Aquatic Sciences  
452 2554:iv+89.
- 453 DeBruyn, A. M. H., D. J. Marcogliese, and J. B. Rasmussen. 2003. The role of sewage in a large river  
454 food web. *Canadian Journal of Fisheries and Aquatic Sciences* 60:1332–1344.
- 455 Debruyn, A. M. H., K. S. Mccann, J. B. Rasmussen, A. M. H. Debruyn, K. S. Mccann, and J. B.  
456 Rasmussen. 2020. Migration Supports Uneven Consumer Control in a Sewage-Enriched River  
457 Food Web Published by : British Ecological Society Linked references are available on JSTOR  
458 for this article : Migration supports uneven consumer control in a sewage-enriched river food  
459 73:737–746.
- 460 Eveleigh, E. S., K. S. McCann, P. C. McCarthy, S. J. Pollock, C. J. Lucarotti, B. Morin, G. a.  
461 McDougall, D. B. Strongman, J. T. Huber, J. Umbanhowar, and L. D. B. Faria. 2007.  
462 Fluctuations in density of an outbreak species drive diversity cascades in food webs. *Proceedings*  
463 *of the National Academy of Sciences* 104:16976–16981.
- 464 Fernandez-Jover, D., P. Sanchez-Jerez, J. T. Bayle-Sempere, C. Valle, and S. Derrien. 2008. Seasonal  
465 patterns and diets of wild fish assemblages associated with Mediterranean coastal fish farms.  
466 *ICES Journal of Marine Science* 65:1153–1160.

- 467 Hasnain, S. S., M. D. Escobar, and B. J. Shuter. 2018. Estimating thermal response metrics for North  
468 American freshwater fish using Bayesian phylogenetic regression. *Canadian Journal of Fisheries  
469 and Aquatic Sciences* 75:1878–1885.
- 470 Huxel, G. R., K. McCann, and G. a. Polis. 2002. Effects of partitioning allochthonous and  
471 autochthonous resources on food web stability. *Ecological Research* 17:419–432.
- 472 Johnson, L. E., B. McMeans, N. Rooney, M. Gutgesell, R. Moccia, and K. S. McCann. 2018.  
473 Asymmetric assimilation of an anthropogenic resource subsidy in a freshwater food web. *Food  
474 Webs* 15:e00084.
- 475 Lee, K. Y., L. Graham, D. E. Spooner, and M. a. Xenopoulos. 2018. Tracing anthropogenic inputs in  
476 stream foods webs with stable carbon and nitrogen isotope systematics along an agricultural  
477 gradient. *PLoS ONE* 13:1–19.
- 478 Leroux, S. J., and M. Loreau. 2008. Subsidy hypothesis and strength of trophic cascades across  
479 ecosystems. *Ecology Letters* 11:1147–1156.
- 480 McCann, K. S. 2005. The dynamics of spatially coupled food webs:513–523.
- 481 Nakano, S., and M. Murakami. 2001. Reciprocal subsidies: Dynamic interdependence between  
482 terrestrial and aquatic food webs. *Proceedings of the National Academy of Sciences of the United  
483 States of America* 98:166–170.
- 484 Newsome, T. M., J. a. Dellinger, C. R. Pavey, W. J. Ripple, C. R. Shores, A. J. Wirsing, and C. R.  
485 Dickman. 2015. The ecological effects of providing resource subsidies to predators. *Global  
486 Ecology and Biogeography* 24:1–11.
- 487 Parker-Stetter, S. L., L. G. Rudstam, P. J. Sullivan, and David M. Warner. 2009. Standard operating  
488 procedures for fisheries acoustic surveys in the Great Lakes. *Special Publication 09-01 January  
489 2009. Great Lakes Fishery Commission.*

- 490 Polis, G. a., W. B. Anderson, and R. D. Holt. 1997. Toward an integration of landscape and food web  
491 ecology: The dynamics of spatially subsidized food webs. *Annual Review of Ecology and*  
492 *Systematics* 28:289–316.
- 493 Polis, G. a., and D. R. Strong. 1996. Food web complexity and community dynamics. *American*  
494 *Naturalist* 147:813–846.
- 495 Post, D. M. 2002. Using stable isotopes to estimate trophic position: models, methos, and assumptions.  
496 . *Ecology* 83:703–718.
- 497 Post, D. M., C. A. Layman, D. A. Arrington, G. Takimoto, J. Quattrochi, and C. G. Montaña. 2007.  
498 Getting to the fat of the matter: Models, methods and assumptions for dealing with lipids in stable  
499 isotope analyses. *Oecologia* 152:179–189.
- 500 Rennie, M. D., P. J. Kennedy, K. H. Mills, C. L. Podemski, C. M. C. Rodgers, C. Charles, L. E.  
501 Hrenchuk, S. Chalanchuk, P. J. Blanchfield, and M. J. Paterson. 2019. Impacts of freshwater  
502 aquaculture on fish communities : A whole- - ecosystem experimental approach:870–885.
- 503 Rodewald, A. D., L. J. Kearns, and D. P. Shustack. 2011. Anthropogenic resource subsidies decouple  
504 predator-prey relationships. *Ecological Applications* 21:936–943.
- 505 Sears, A. ., R. D. Holt, and G. a. Polis. 2004. Feast and Famine in Food Webs: The Effects of Pulsed  
506 Productivity. Pages 359-386 in G.A. Polis, G.R. Huxel and M.Power, eds. *Food Webs at the*  
507 *Landscape Scale: The Ecology of Trophic Flow across Habitats*. University of Chicago Press,  
508 Chicago, IL.
- 509 Steeves, H. N., B. McMeans, C. Field, C. Stewart, M. T. Arts, A. T. Fisk, C. Lydersen, K. M. Kovacs,  
510 and M. A. Macneil. 2018. Non-parametric analysis of the spatio-temporal variability in the fatty-  
511 acid profiles among Greenland sharks. *Journal of the Marine Biological Association of the United*

512 Kingdom 98:627–633.

513 Takimoto, G., T. Iwata, and M. Murakami. 2002. Seasonal subsidy stabilizes food web dynamics:  
514 Balance in a heterogeneous landscape. *Ecological Research* 17:433–439.

515 Upper Great Lakes Management Unit (UGLMU). (2018). Annual Report of Fisheries Assessment  
516 Projects Conducted on Lake Huron, 2017. Ministry of Natural Resources and Forestry, Report  
517 PS-LHA-2017-01.

518 Vander Zanden, M. J., and J. B. Rasmussen. 1999. Primary Consumer  $\delta^{13}C$  and  $\delta^{15}N$  and the Trophic  
519 Position of Aquatic Consumers. *Ecology* 80:1395–1404.

520 Vander Zanden, M. J., B. J. Shuter, N. Lester, and J. B. Rasmussen. 1999. Patterns of food chain  
521 length in lakes: A stable isotope study. *American Naturalist* 154:406–416.

522

523

524

525

526

527

528

529

530

531

532

533

534



535 **Figure 1.** Conceptual figure of food web interactions within (a) natural temperate lake food web  
536 and (b) a temperate lake food web with a pelagic point-source anthropogenic subsidy input,  
537 which here is released net-pen feed. It is predicted that net-pen feed will alter food web structure  
538 through asymmetric accessibility to surrounding food web. Therefore, we expect to see strong  
539 assimilation of net-pen feed in cold water fish and subsequent increases in trophic level and  
540 biomass. It is expected that some assimilation occurs in cool water fish, and no assimilation of  
541 net-pen feed occurs in warm water guild.

542 **Figure 2.** Principal component analysis of fatty acids >1% of total fatty acid composition of all prey  
543 fish, baseline, and feed samples analyzed in (a) 2016 and (b) 2017. Feed separated from lake biota  
544 (except for littoral baselines) along PC1 in both 2016 and 2017. 2016 feed was separated by 3 FA  
545 (higher levels of 18:2n6, 18:1n9, 20:1n9). In 2017, feed was separated by 4 FA (higher levels of  
546 18:2n6, 18:3n3, 18:1n9, and 16:1n7).

547 **Figure 3.** (i) PCA and (ii) univariate boxplot comparisons of feed indicator fatty acids (FIFA)  
548 for (a) cool and (b) warm generalist, top predators and (c) cool water forage fish collected from  
549 Parry Sound (PS) (anthropogenic subsidy input site) and control sites (Shawanaga Bay, SHN) in  
550 2016.

551 **Figure 4.** (i) PCA and (ii) univariate boxplot comparisons of feed indicator fatty acids (FIFA)  
552 for (a) cold, (c) cool, and (e) warm generalist top predators, and (b) cold and (d) cool water  
553 forage fish collected from Parry Sound (PS) (anthropogenic subsidy input site) and control sites  
554 (Dyers Bay, DB; Shawanaga Bay, SHN; Key Harbour, KH) in 2017.

555 **Figure 5.** Euclidean distance between centroids of net-pen and control sites, calculated  
556 separately for each species and year, in relation to species' final temperature preference. Blue

557 represents species in the cold thermal guild, yellow and orange are species in the cool thermal  
558 guild, and red is species in the warm thermal guild.

559 **Figure 6.** Change in fish density (fish count/m<sup>2</sup>) relative to distance from net-pen facility (m) in Parry  
560 Sound for (a) day time transect and (b) night time transect in July 2017. Map inset shows transect  
561 location in relation to net-pen facility in Parry Sound (red box), Georgian Bay. Fish density declined  
562 with increasing distance from net-pen during the day, however this decline was not significant  
563 ( $R^2=0.158$ ,  $p = 0.0821$ ). Fish density significantly declined with increasing distance from net-pen  
564 facility at night ( $R^2 =0.43$ ,  $p <0.0001$ ).

565 **Figure 7.** Distribution of biomass proportion across thermal guilds of all species collected from  
566 MNRF BSM sampling in Georgian Bay, Lake Huron in 2017. Thermal guilds are indicated by colour,  
567 asterisks next to site name indicate sites with presence of net-pen facility. Parry Sound and South Bay,  
568 both of which contain net-pen aquaculture facilities, demonstrate higher proportion of species biomass  
569 in the cold thermal guild (off-shore species) relative to control sites. Specifically, cold water species  
570 biomass in Parry Sound is 2.0 – 7.9 times higher than control sites sampled throughout Georgian Bay,  
571 where no net-pen aquaculture facilities were located. High relative biomass of cold water species in  
572 Parry Sound to control sites was not reflected in the cool and warm water guilds.

573 **Figure 8.** Trophic position of (a) cold, (b) cool and (c) warm generalist top predators, and (d) cold and  
574 (e) cool water forage fish collected from Parry Sound (indicated in red) and control sites in 2017.  
575 Samples are a combination of those collected by our research team and the MNRF. Asterisks indicate  
576 significant differences based on Tukey post-hoc analysis.

577

578

579

580 **Figures**

581 **Figure 1**

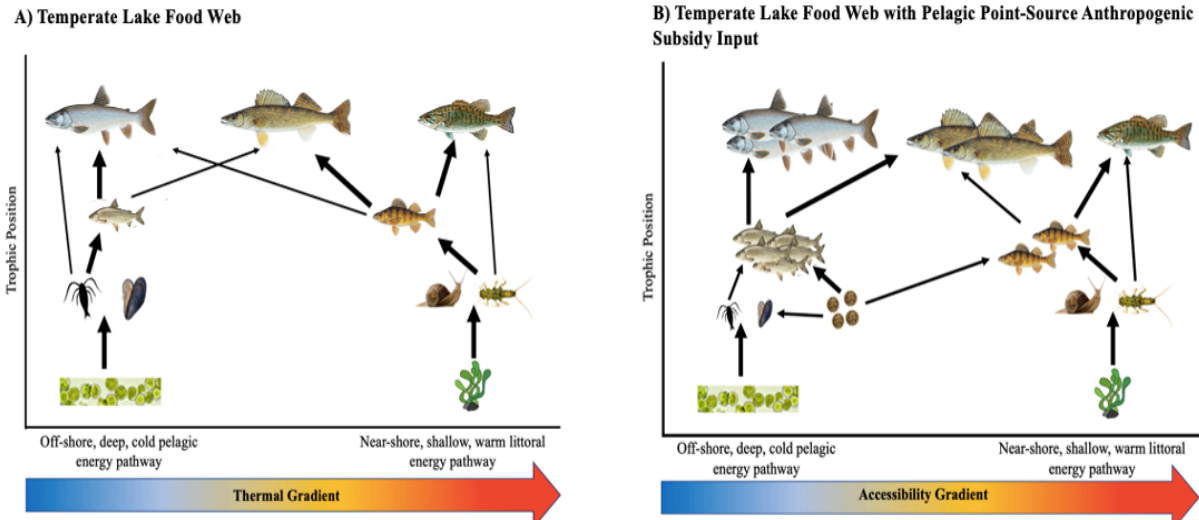

582

583

584 **Figure 2**

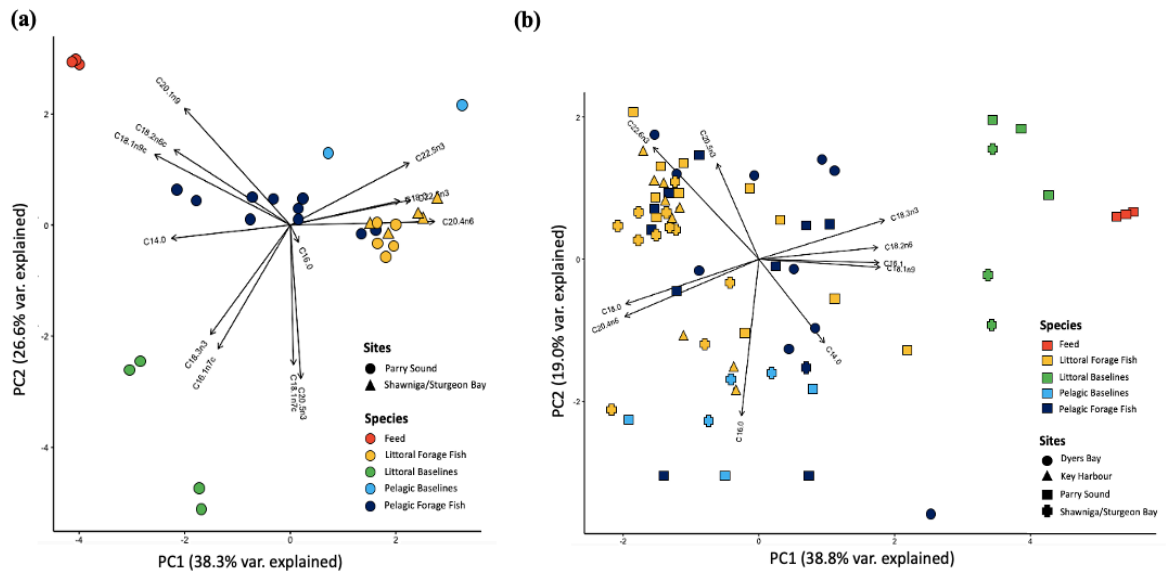

585

586

587 **Figure 3**

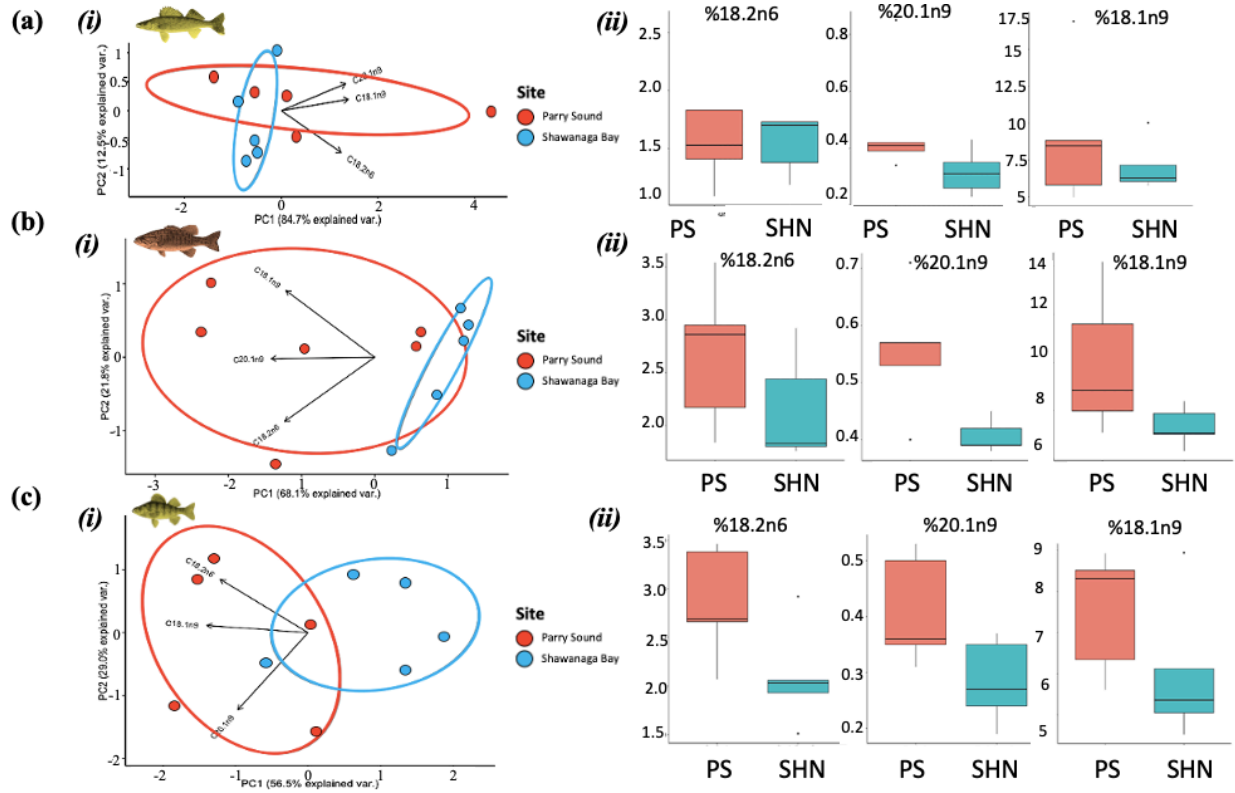

588

589

590

591 **Figure 4**

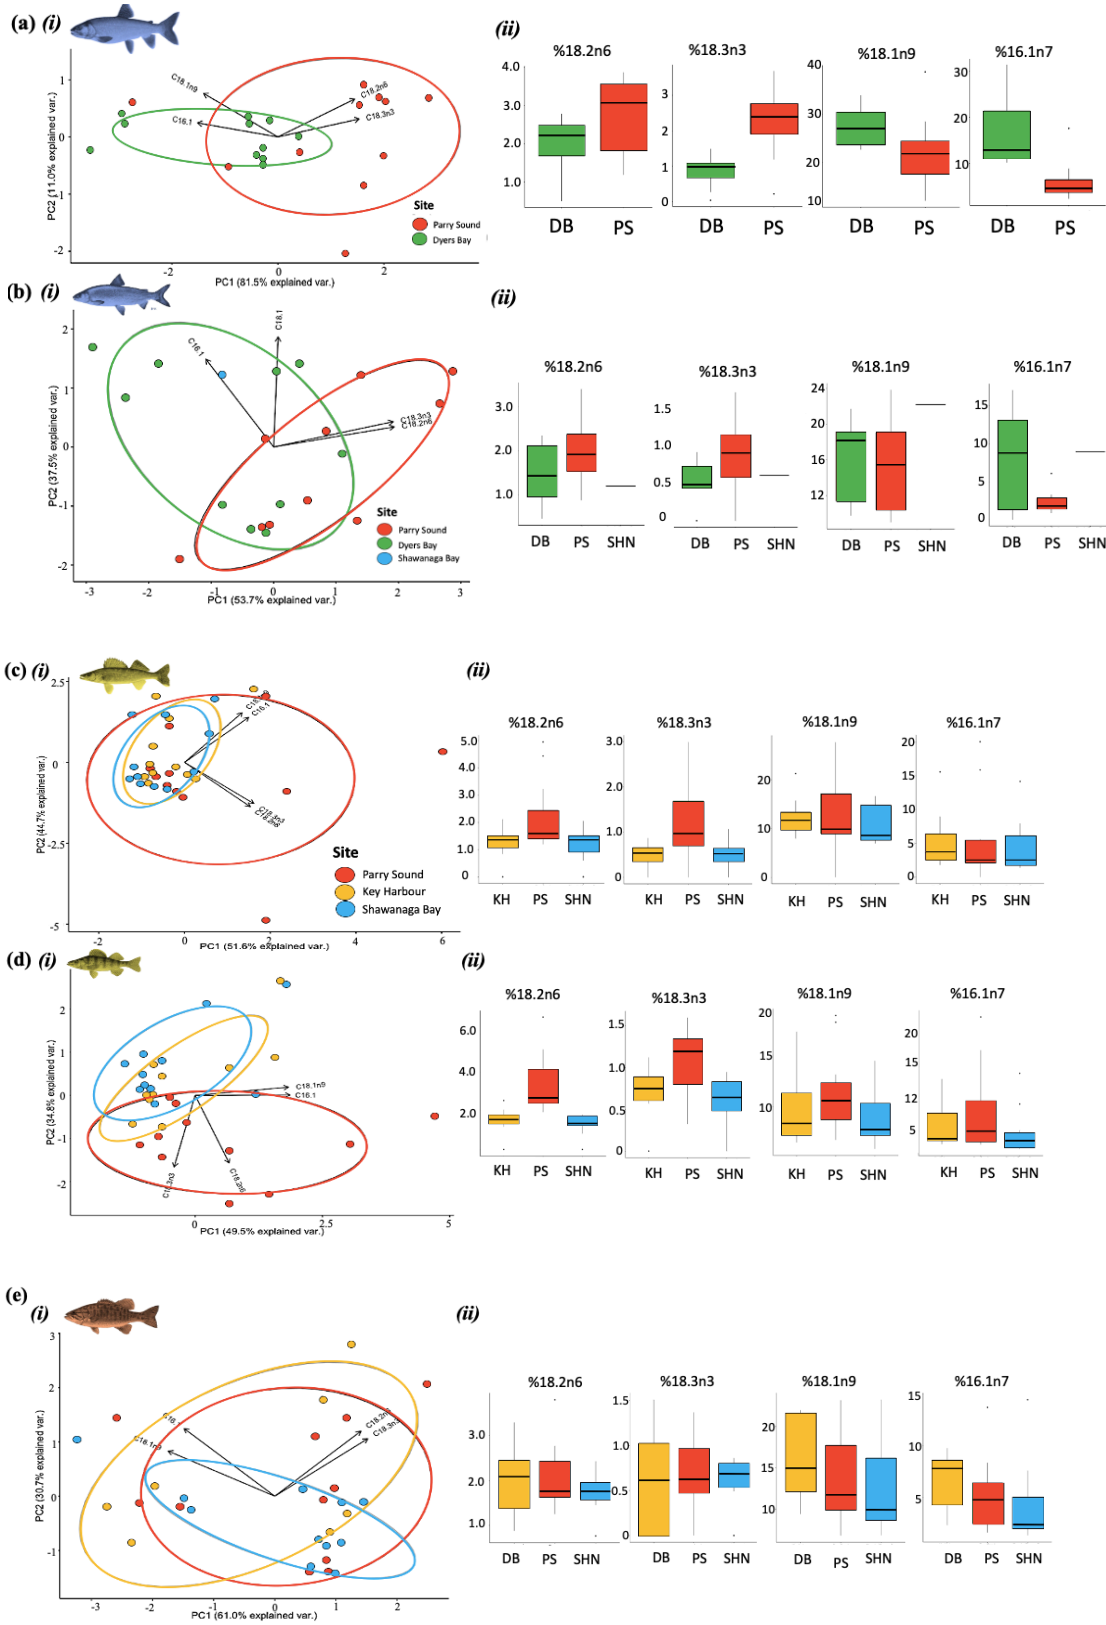

592

593

594

595 **Figure 5**

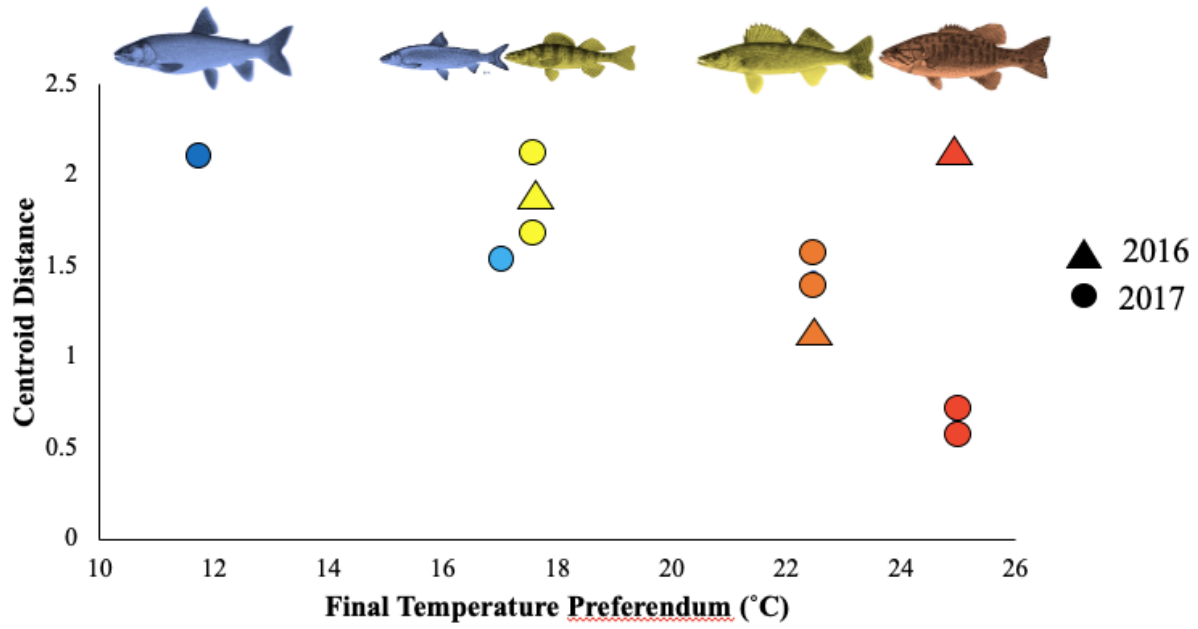

596

597

598 **Figure 6**

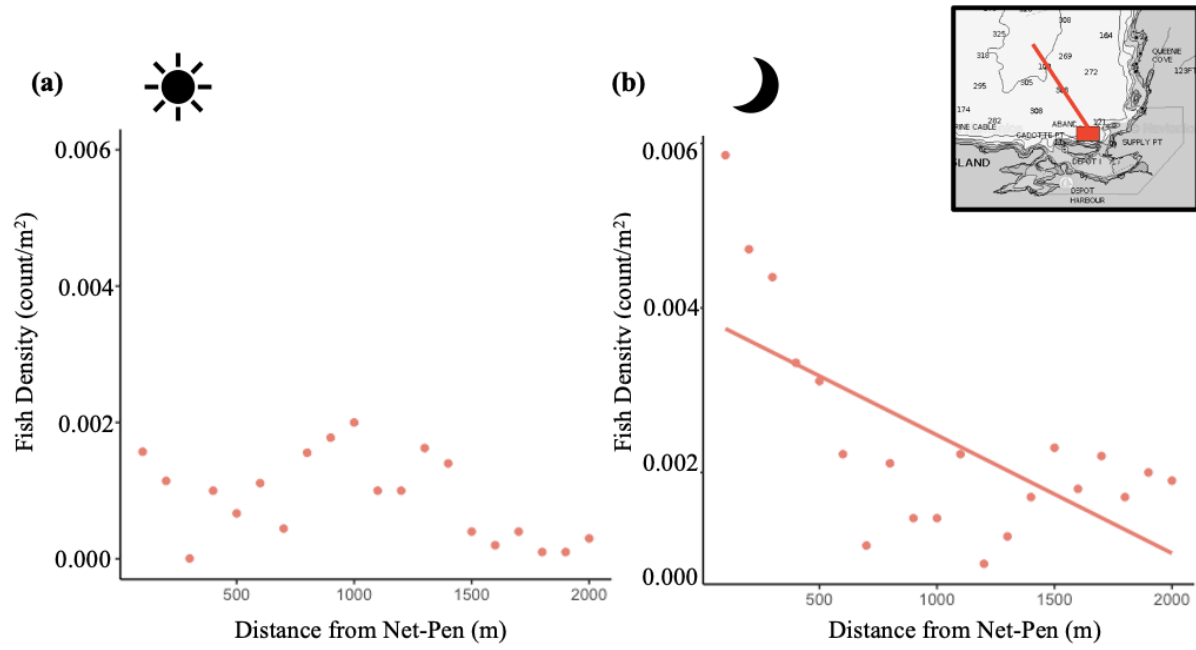

599

600



601 **Figure 7**

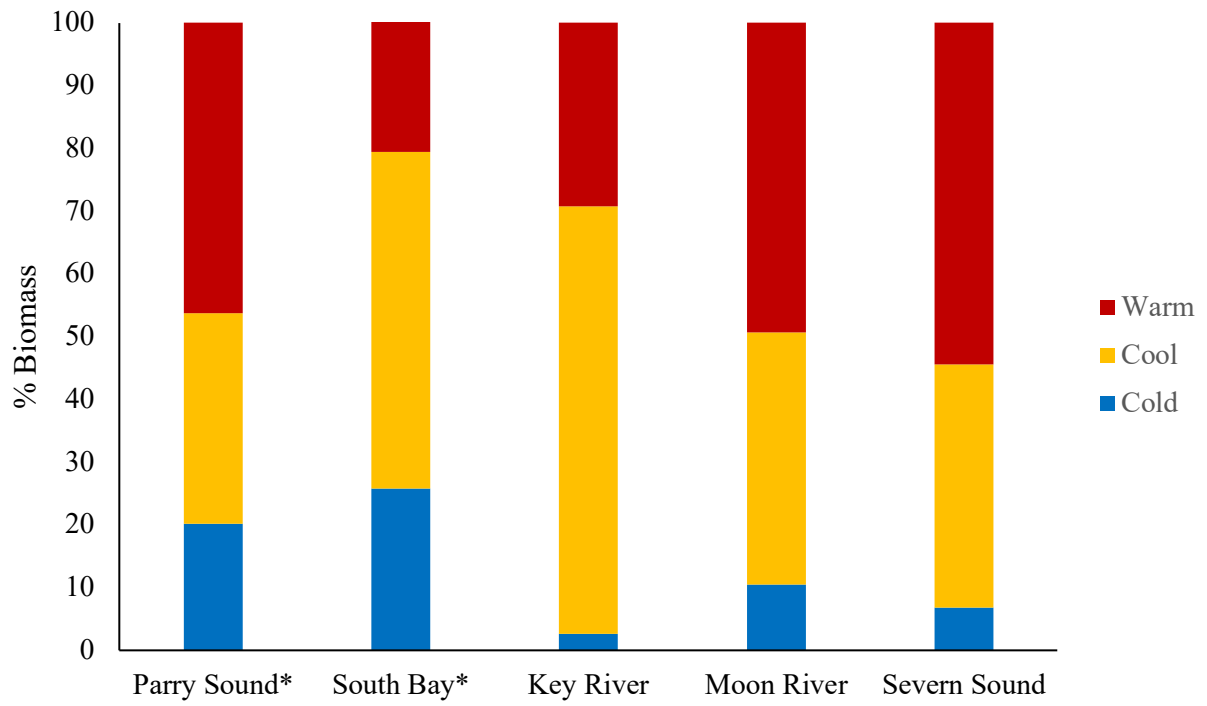

602

603

604 **Figure 8**

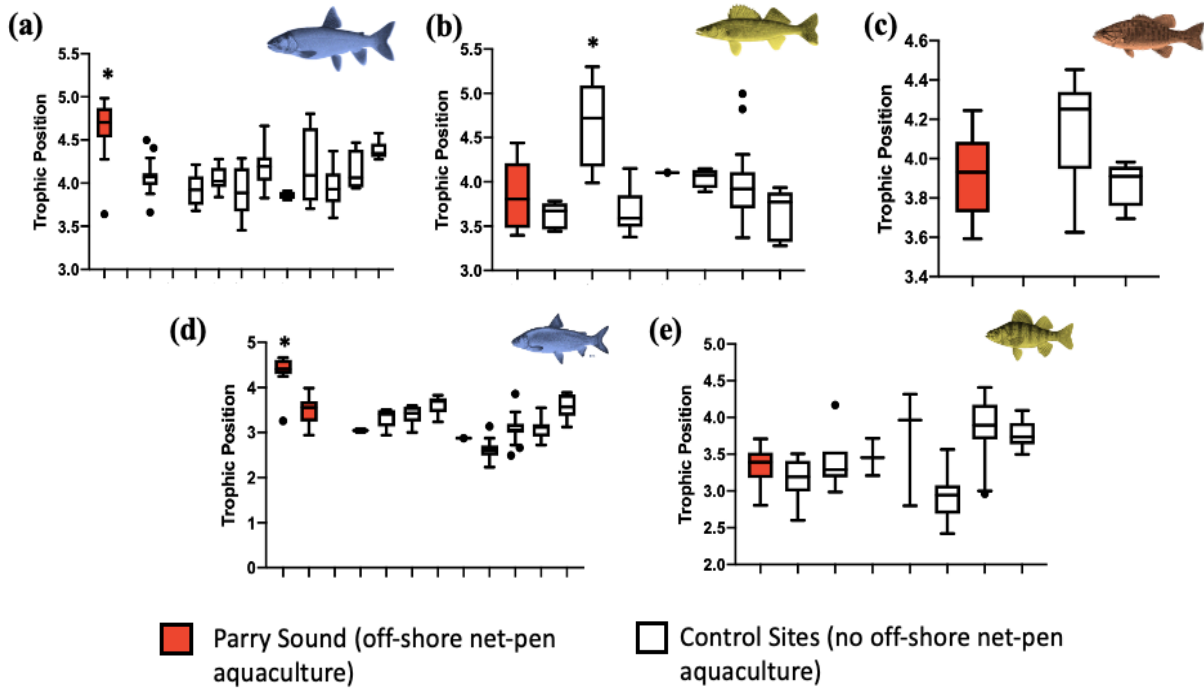

605

606

607
