# Supplementary material for: Subsidy Accessibility Drives Asymmetric Food Web Responses
Source: bioRxiv or medRxiv preprint supplement (doi:10.1101/2020.11.09.374629), 2020-11-10
Supplement: Supplementary file [file media-1.pdf]

# 1 **Subsidy Accessibility Drives Asymmetric Food Web Responses**

2 Marie Gutgesell<sup>1</sup>, Bailey C. McMeans<sup>2</sup>, Matthew M. Guzzo<sup>1</sup>, Valesca deGroot<sup>3</sup>, Aaron T. Fisk<sup>5</sup>,

3 Timothy B. Johnson<sup>4</sup>, Kevin S. McCann<sup>1</sup>

4 Ecology

## 5 **Appendix S2: Detailed Hydroacoustic Data Collection Methods**

### 6 *Transect set up and BioSonics hydroacoustic data collection*

7 In July 2017, both night-time and day-time SONAR surveys were conducted in Lake  
8 Huron along one transect starting at, and leading away from the Aqua-Cage Fisheries cage-  
9 culture (Parry Sound, Ontario, Canada; Fig. 6). The day-time survey was conducted from  
10 2:30pm to 7pm, while the night-time survey was conducted from 11:45pm to 4 am. The  
11 thermocline was estimated based on temperature profiles, sitting at approximately 10m below the  
12 surface.

13 Hydroacoustic procedures were based on Parker-Stetter et al.'s (2009) "Standard  
14 operating procedures for fisheries acoustic surveys in the great lakes". Acoustic data was  
15 collected with a BioSonics DT-X extreme autonomous portable scientific echosounder equipped  
16 with a 430 kHz and a 120 kHz elliptical split-beam transducer, calibrated by the standard sphere  
17 method (Foote et al. 1987). For the purpose of this study, only the 120 kHz frequency echogram  
18 returns were analysed due to target specimen size (fish as opposed to zooplankton). The  
19 transducer was deployed off the stern of the vessel at a depth of 1m where it was dragged along  
20 the transect at a survey speed of 5.5-6 km/h. Ping rates of 0.8 pings/s were used with a pulse  
21 duration of 0.5 ms to allow for the discrimination of fish from the bottom, avoiding 'shadow  
22 bottom'. Acoustic signals were collected with BioSonics Visual Acquisition Software (version

23 4.1), and output files were stored on a laptop computer hard drive. Vessel position was integrated  
24 into the BioSonics output files by associating each ping return with GPS coordinates.

25

#### 26 *Echoview data clean up*

27 Acoustic echogram files were processed using Echoview acoustic postprocessing  
28 software (Fig. 2; version 7.1.36.30718, SonarData). At each transect water temperature and depth  
29 were recorded, however, salinity was not measured, therefore this value was not incorporated for  
30 calculations of sound speed and absorption coefficient. The calibration values within the  
31 Echoview software were compared to that of the calibration settings of the DTX BioSonics  
32 Echosounder during the sampling period, ensuring a consistent offset value of 0.4. A surface  
33 exclusion zone was determined at a depth of 1m and all data above this line was excluded to  
34 avoid any trawling noise pulse manipulation. The best bottom candidate algorithm was used to  
35 define the lake bottom due to variation in depth profile. After defining the lake bottom, a linear  
36 offset line was added 1m above the bottom line marking the bottom dead zone, in which fish and  
37 any other minute biotic and abiotic pulse returns against the bottom of the lake were excluded  
38 from analysis.

39 Background noise removal was conducted by applying bad data regions and by running a  
40 background noise removal algorithm. Echoview considers bad data regions as no data which  
41 consists of data points which are off transect, below the target layer, or have been subjected to  
42 bad weather, interference, ghost bottoms, and echosounder malfunction. Empty water is also  
43 removed by applying bad data regions, which excludes volumes of water devoid of targets. The  
44 background noise removal scrutinizes the data for acoustic, electrical, and trawl noise by  
45 estimating the background noise value for each ping and then subtracting it from the ping's

46 samples. The values used in this algorithm were based on DeRobertis & Higginbottom (2007)  
47 and are available in Table 1.

48         The Method 2 split-beam single target detection algorithm was then applied to isolate  
49 single-fish echoes by utilizing aspects and characteristics of the shape of the return pulse. Values  
50 from Hrabik et al. (2006) were applied (Table 2). This algorithm allows an echo to be classified  
51 as a single target if it meets the following criteria: (1) the echo TS value is a local maximum  
52 (larger than surrounding digital samples); (2) the echo TS exceeds a 55-dB threshold; (3) the  
53 beam compensation value for the echo is less than 6 dB; (4) the echo pulse duration, which is  
54 measured 6 dB from the echo envelope peak, has to fall between 0.8 and 1.5 times the emitted  
55 pulse duration; and (5) the standard deviation of all samples within the pulse envelope have to be  
56 less than 1.5 (Stockwell et al., 2007).

57

#### 58 *Fish count and density calculation*

59         The previous data clean up procedures yield an echogram that allows for accurate fish  
60 count determination along the transect (Fig. 2). These fish counts can thereafter be converted into  
61 density values to provide a representation of fish aggregation in relation to the high nutrient  
62 densities surrounding the net pen aquaculture. Fish count was separated into bins to avoid any  
63 pulse return bias, as pulses are amplified with increased depth. The vertical bin size was based on  
64 the value suggested by Parker Stetter et al. (2009) for Lake Huron, at a length of ten meters. The  
65 horizontal bin size, however, was altered from Parker Stetter et al.'s (2009) suggestion to allow  
66 for the visualization of small-scale changes along the 2000m transect, applying bins of 100  
67 meters instead of 1000m. The fish counts were calculated for each bin, summed within 100m  
68 horizontal increments, and divided by the total vertical area of the analysed bin to provide

69 numerical fish densities (fish count/m<sup>2</sup>) for every 100m along the transect. The counts were also  
70 summed by depth layer (horizontally) to provide information on percent fish distribution at  
71 differing depths along the transect.

72

### 73 *Statistical analysis*

74 To determine whether a significant relationship was observed between fish density and  
75 transect distance, linear regressions plotting fish density against transect distance were performed  
76 in RStudio for the five night transects and the five day transects. Density measurements were  
77 plotted for every 100m of transect length for each ~2000m transect, and data yielding non-linear  
78 patterns were log transformed. Significance was determined by comparing p-values to an alpha  
79 value of 0.05.

80

81

82 **Literature Cited**

83 DeRobertis, A., and I. Higginbottom. 2007. A post-processing technique to estimate the signal-  
84 to-noise ratio and remove echosounder background noise. *ICES J. Mar. Sci.* 64: 1282-1291.

85 Foote, K.G., Knudsen, H.P., Vestnes, G., MacLennan, D.N., and Simmonds, E.J. 1987.  
86 Calibration of acoustic instruments for fish density estimation: a practical guide. ICES  
87 Cooperative Res. Rep. No. 144.

88 Hrabik, T., Schreiner, D., Balge, M., & Geving, S. (2006). Development of a hydroacoustic  
89 survey design to quantify prey fish abundance in the Minnesota waters of Lake  
90 Superior. *Minnesota Department of Natural Resources, Investigational Report, 530.*

91 Parker-Stetter, S. L., L. G. Rudstam, P. J. Sullivan, and David M. Warner. 2009. Standard  
92 operating procedures for fisheries acoustic surveys in the Great Lakes. Special Publication  
93 09-01 January 2009. Great Lakes Fishery Commission.

94 Stockwell, J. D., Yule, D. L., Hrabik, T. R., Adams, J. V., Gorman, O. T., & Holbrook, B. V.  
95 (2007). Vertical distribution of fish biomass in Lake Superior: implications for day bottom trawl  
96 surveys. *North American Journal of Fisheries Management*, **27**(3), 735-749.

97

98
