# Supplementary material for: Subsidy Accessibility Drives Asymmetric Food Web Responses
Source: bioRxiv or medRxiv preprint supplement (doi:10.1101/2020.11.09.374629), 2020-11-10
Supplement: Supplementary file [file media-2.pdf]

1 **Subsidy Accessibility Drives Asymmetric Food Web Responses**

2 Marie Gutgesell<sup>1</sup>, Bailey C. McMeans<sup>2</sup>, Matthew M. Guzzo<sup>1</sup>, Valesca deGroot<sup>3</sup>, Aaron T. Fisk<sup>5</sup>,

3 Timothy B. Johnson<sup>4</sup>, Kevin S. McCann<sup>1</sup>

4 Ecology

5 **Appendix 1: Supplementary Tables & Figures**

6 **Table S1** Composition of feed pellets used by AquaCage Fisheries Inc. in 2016 and 2017. In

7 2016, only one size of feed was sampled.

| <b>Year</b> | <b>Feed Size (mm)</b> | <b>Fish Size (g)</b> | <b>Protein (min)</b> | <b>Oil (min)</b> | <b>Moisture (max)</b> | <b>Fibre (max)</b> | <b>Ash (max)</b> | <b>Phos (max)</b> | <b>DE (MJ/KG)</b> |
|-------------|-----------------------|----------------------|----------------------|------------------|-----------------------|--------------------|------------------|-------------------|-------------------|
| 2016        | 6                     | 500-1000             | 46%                  | 24%              | 8%                    | 2%                 | 10%              | 1%                | 19.5              |
| 2017        | 4                     | 100-400              | 45%                  | 28%              | 8.50%                 | 1.50%              | 12%              | NA                | 20.2              |
| 2017        | 6                     | 400-1000             | 43%                  | 31%              | 8.50%                 | 1.50%              | 12%              | NA                | 20.2              |
| 2017        | 7.5                   | 1000+                | 39%                  | 32%              | 8.50%                 | 1.50%              | 12%              | NA                | 20.2              |

8

9

10

11 **Table S2.** Proportion (%) of fatty acids (>1% in system) in feed in 2016 and 2017. Values for  
 12 2017 were calculated as an average of fatty acid % in all three feed sizes. Fatty Acid Type  
 13 describes how fatty acids were characterized in our study: Dietary Fatty Acids (DFA); and Feed  
 14 Indicator Fatty Acids (FIFA). The year following FIFA indicates which year fatty was a feed  
 15 indicator. % FIFA are indicated in bold.  
 16

| Fatty Acid     | Fatty Acid Type    | 2016          | 2017 <sup>17</sup> |
|----------------|--------------------|---------------|--------------------|
|                |                    |               | 18                 |
| C14:0          | EDFA               | 3.289         | 2.587              |
| C16:0          | EDFA               | 19.919        | 19.016             |
| <b>C16:1n7</b> | <b>FIFA_2017</b>   | 5.230         | <b>9.497</b>       |
| C18:0          | EDFA               | 4.587         | 5.818              |
| <b>C18.1n9</b> | <b>FIFA_2016/7</b> | <b>23.993</b> | <b>30.430</b>      |
| C:18:1n7       | EDFA               | 2.073         | unk                |
| <b>C18.2n6</b> | <b>FIFA_2016/7</b> | <b>17.265</b> | <b>22.180</b>      |
| <b>C20.1n9</b> | <b>FIFA_2016</b>   | <b>3.775</b>  | 0.000              |
| <b>C18:3n3</b> | <b>FIFA_2017</b>   | 1.550         | <b>5.529</b>       |
| C20:4n6        | EDFA               | 0.558         | 0.247              |
| C20:5n3c       | EDFA               | 3.705         | 2.384              |
| C22:5n3        | EDFA               | 0.514         | unk                |
| C22:6n3c       | EDFA               | 3.645         | 0.216              |

20 **Table S3.** Final temperature preferendum (FTP), thermal guild, and proportion (%) biomass of  
 21 each species caught in 5 locations as part of the OMNRF 2017 Broad-scale Monitoring Program  
 22 in Lake Huron. Values were extracted from UGLMU, 2018 Figure 4 (Key River); Fig. 7 (Moon  
 23 River); Fig. 10 (Parry Sound); Fig 12 (Severn Sound); and Fig. 14 (South Bay). The BROADSCALE  
 24 Fish Community Monitoring design used both large mesh and small mesh gillnets. The large  
 25 mesh gillnets had eight panels (mesh sizes 38 mm to 127 mm stretched mesh) and a total length  
 26 of 24.85 m. The small mesh gillnets had five panels (mesh sizes from 13 mm to 38 mm stretched  
 27 mesh) with a total length of 12.5 m. Nets were set overnight and in pairs. Sites were selected  
 28 using a depth-stratified randomized design using ArcGIS.

| <b>Species</b>           | <b>FTP<br/>(°C)</b> | <b>Thermal<br/>Guild</b> | <b>Key<br/>River</b> | <b>Moon<br/>River</b> | <b>Parry<br/>Sound</b> | <b>Severn<br/>Sound</b> | <b>South<br/>Bay</b> |
|--------------------------|---------------------|--------------------------|----------------------|-----------------------|------------------------|-------------------------|----------------------|
| <i>Alewife</i>           | 16.9                | Cold                     | 0.10                 | 0.10                  | 1.20                   | 0.34                    | 0.34                 |
| <i>Black Crappie</i>     | 23.4                | Cool                     | 0.26                 | 0.10                  | -                      | 0.68                    | -                    |
| <i>Bluntnose Minnow</i>  | 24.1                | Cool                     | 0.10                 | 0.10                  | 0.34                   | -                       | 0.34                 |
| <i>Blackchin Shiner</i>  | 21.8                | Cool                     | 0.10                 | 0.10                  | -                      | -                       | -                    |
| <i>Blacknose Shiner</i>  |                     | Cool                     | 0.10                 | -                     | -                      | -                       | -                    |
| <i>Bowfin</i>            | 30.3                | Warm                     | 3.07                 | 1.17                  | 3.59                   | 0.68                    | 4.47                 |
| <i>Brown Bullhead</i>    | 26.2                | Warm                     | 6.14                 | 7.49                  | 2.39                   | 2.38                    | 3.44                 |
| <i>Bluegill</i>          | 30.2                | Warm                     | -                    | -                     | -                      | 0.34                    | -                    |
| <i>Brook Stickleback</i> | 21.3                | Cool                     | -                    | -                     | -                      | -                       | 0.34                 |
| <i>Burbot</i>            | 13.2                | Cold                     | 1.02                 | 6.79                  | -                      | 1.02                    | 5.84                 |
| <i>Channel Catfish</i>   | 27.3                | Warm                     | 0.26                 | 1.40                  | -                      | -                       | -                    |

|                        |      |      |       |       |       |       |       |  |
|------------------------|------|------|-------|-------|-------|-------|-------|--|
| <i>Common Shiner</i>   | 21.9 | Cool | -     | 0.10  | 0.17  | -     | -     |  |
| <i>Chinook Salmon</i>  | 13.8 | Cold | -     | -     | -     | 3.40  | -     |  |
| <i>Common Carp</i>     | 27.7 | Warm | -     | -     | 2.56  | 3.40  | 3.09  |  |
| <i>Golden Shiner</i>   | 21.8 | Cool | 0.10  | 0.10  | -     | -     | -     |  |
| <i>Emerald Shiner</i>  | 19.3 | Cool | -     | -     | 0.17  | -     | -     |  |
| <i>Johnny Darter</i>   | 22.8 | Cool | 0.10  | 0.10  | -     | -     | -     |  |
| <i>Lake Chub</i>       | 27   | Warm | 0.26  | 0.10  | -     | -     | -     |  |
| <i>Lake Herring,</i>   |      |      |       |       |       |       |       |  |
| <i>Cisco</i>           | 12.4 | Cold | 0.26  | 0.10  | 2.91  | 0.34  | 1.72  |  |
| <i>Lake Trout</i>      | 11.8 | Cold | -     | 3.04  | 12.31 | -     | -     |  |
| <i>Lake Whitefish</i>  | 12.7 | Cold | -     | -     | 2.22  | 0.34  | 16.49 |  |
| <i>Largemouth Bass</i> | 28.6 | Warm | 0.10  | 0.10  | 1.54  | 2.72  | -     |  |
| <i>Longnose Gar</i>    | 27.4 | Warm | 1.54  | 10.53 | 3.93  | 24.15 | -     |  |
| <i>Logperch</i>        |      | Cool | 0.10  | -     | -     | -     | -     |  |
| <i>Longnose Sucker</i> | 11.1 | Cold | 0.77  | 0.23  | -     | -     | -     |  |
| <i>Mimic Shiner</i>    |      | Cool | -     | 0.10  | -     | 0.34  | 0.34  |  |
| <i>Muskellunge</i>     | 25.4 | Warm | -     | -     | -     | 1.70  | -     |  |
| <i>Northern Pike</i>   | 20.7 | Cool | 20.98 | 21.30 | 9.74  | 7.82  | -     |  |
| <i>Pumpkinseed</i>     | 27.7 | Warm | 0.26  | 0.47  | 0.17  | 0.68  | -     |  |
| <i>Rainbow Smelt</i>   | 11.2 | Cold | 0.26  | 0.23  | 0.17  | 0.68  | 1.37  |  |
| <i>Rainbow Trout</i>   | 15.5 | Cold | -     | -     | 0.85  | -     | -     |  |
| <i>Rock Bass</i>       | 24.9 | Cool | 2.56  | 3.04  | 2.05  | 1.02  | 1.72  |  |
| <i>Round Goby</i>      | 20.7 | Cool | 0.26  | 0.10  | 0.34  | 0.34  | 0.69  |  |

|                        |      |      |       |       |       |       |       |
|------------------------|------|------|-------|-------|-------|-------|-------|
| <i>Smallmouth Bass</i> | 25   | Warm | 16.12 | 26.91 | 32.14 | 17.69 | 9.97  |
| <i>Spoonhead</i>       |      |      |       |       |       |       |       |
| <i>Sculpin</i>         | 6    | Cold | -     | -     | 0.17  | -     | -     |
| <i>Spottail Shiner</i> | 16.6 | Cold | 0.10  | -     | 0.17  | 0.34  | -     |
| <i>Threespine</i>      |      |      |       |       |       |       |       |
| <i>Stickleback</i>     | 12.5 | Cold | 0.10  | -     | -     | -     | -     |
| <i>Trout-perch</i>     | 13.4 | Cold | -     | -     | 0.17  | 0.34  | -     |
| <i>Walleye</i>         | 22.5 | Cool | 20.98 | 13.57 | 8.38  | 11.90 | 2.06  |
| <i>White Sucker</i>    | 23.4 | Cool | 14.84 | -     | 8.03  | 2.72  | 12.71 |
| <i>White Perch</i>     | 29.8 | Warm | 1.54  | 0.94  | -     | 0.68  | -     |
| <i>White Bass</i>      | 27.3 | Warm | -     | 0.23  | -     | -     | -     |
| <i>Yellow Perch</i>    | 17.6 | Cool | 7.68  | 1.40  | 4.27  | 13.95 | 35.40 |

29

30

31 **Figure S1.** Map of sampling locations used in manuscript. Colour of site indicates what analysis  
32 data collected was used in. (SI = Stable Isotope Analysis; FA = Fatty Acid Analysis; Biomass =  
33 Biomass analysis using Broad-scale Monitoring Data). If sites were used for more than one  
34 analysis, all analysis used for are indicated by colour (e.g., data collected from Parry Sound was  
35 used for stable isotope, fatty acid and biomass analysis). Parry Sound is where the net-pen  
36 aquaculture facility is located and thus represents the experimental study site, all other sites are  
37 considered controls.

38 **Figure S2.** Comparison of the three % feed indicator fatty acids in net-pen feed to littoral forage  
39 fish (LFF), littoral baselines (LB), pelagic baselines (PB) and pelagic forage fish (PFF) between  
40 net-pen (Parry Sound) and control sites in 2016.

41 **Figure S3.** Comparison of the four % feed indicator fatty acids in net-pen feed to littoral forage  
42 fish (LFF), littoral baselines (LB), pelagic baselines (PB) and pelagic forage fish (PFF) between  
43 net-pen (Parry Sound) and control sites in 2017.

44

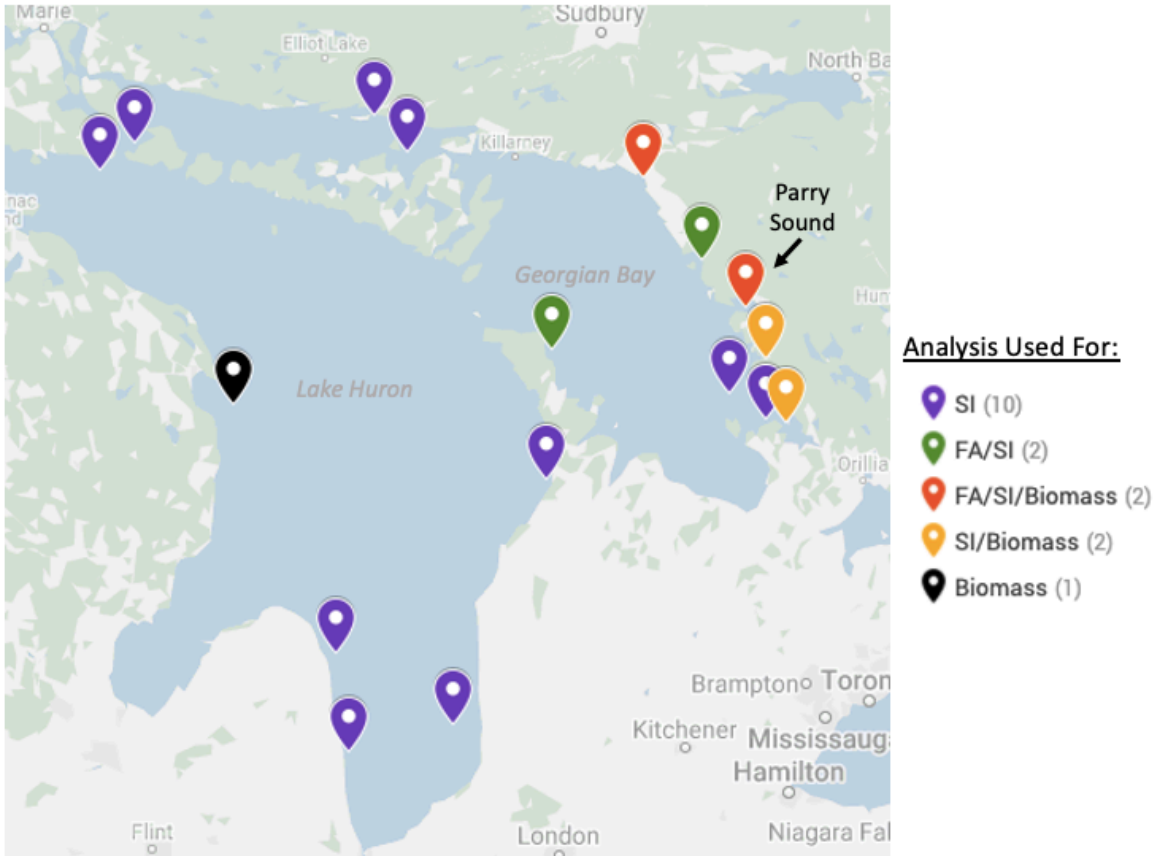

45

46 **Figure S1.**

47

48

49

50

51

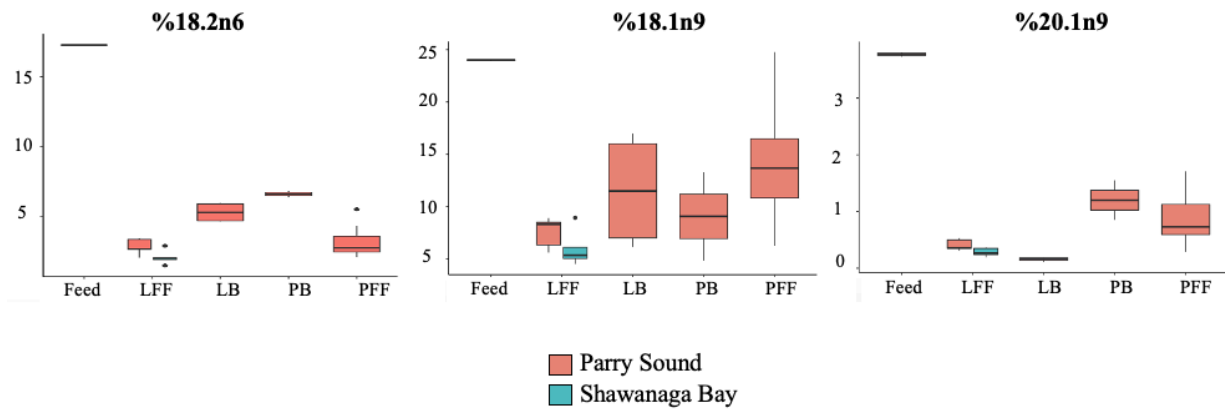

52

53 **Figure S2.**

54



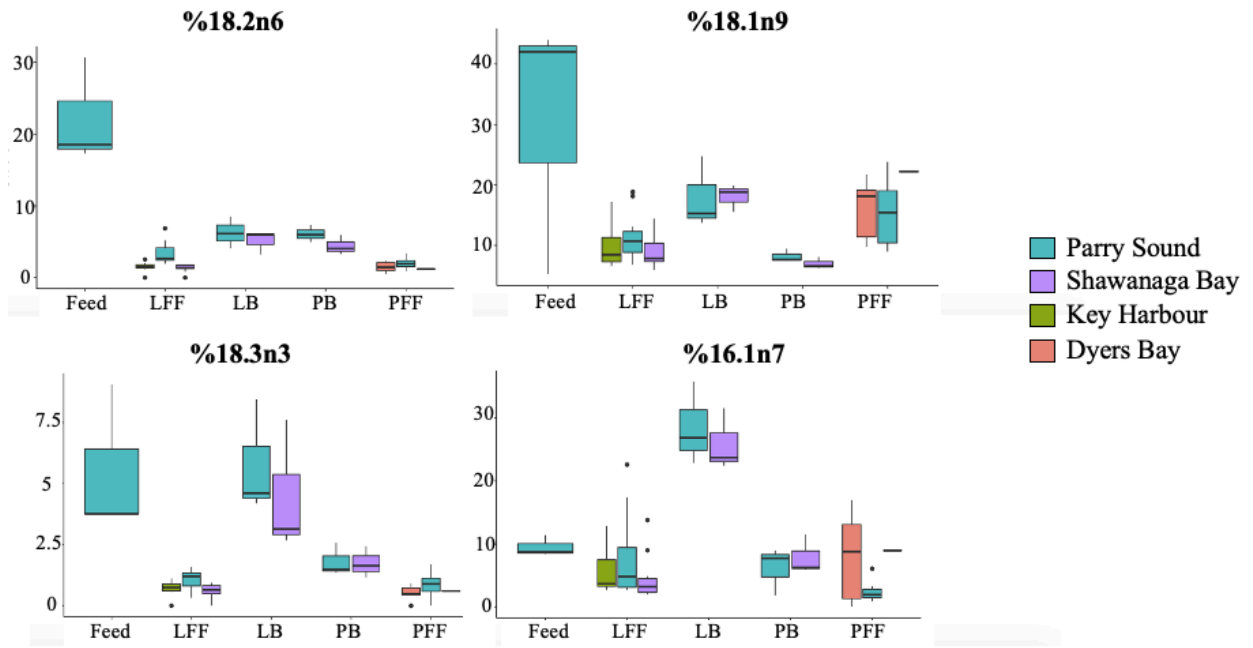

57 **Figure S3.**
